# Supplementary figures and images for: Influence of Addition of Antibiotics on Chemical and Surface Properties of Sol-Gel Coatings
Source: MDPI journal article supplement (doi:10.3390/ma15144752), 2022-07-07

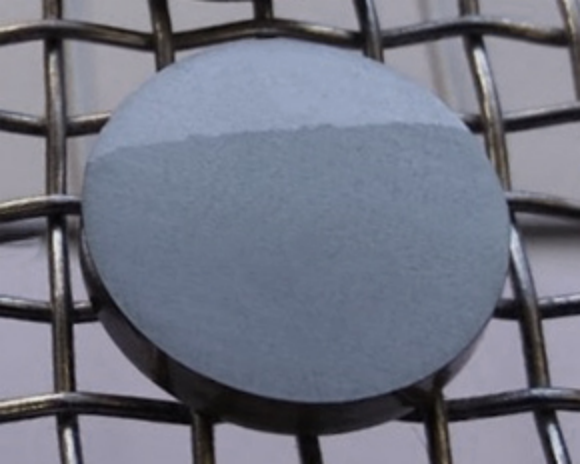

Supplement: s1 [file s1]
